# Supplementary material for: A DFT investigation of the role of oxygen vacancies on the structural, electronic and magnetic properties of ATiO3 (A = Mn, Fe, Ni) multiferroic materials
Source: Royal Society of Chemistry journal article supplement (doi:10.1039/c8cp04443k), 2018-01-01
Supplement: c8cp04443k1.pdf [file c8cp04443k1.pdf]

1 **ADFT investigation of the role of oxygen vacancies on the structural, electronic and magnetic properties**  
2 **of ATiO<sub>3</sub> (A = Mn, Fe, Ni) multiferroic materials**

3 R. A. P. Ribeiro<sup>1</sup>, E. Longo<sup>2</sup>, J. Andrés<sup>3,\*</sup>, S. R. de Lazaro<sup>1</sup>

4 <sup>1</sup>*Department of Chemistry, State University of Ponta Grossa, Av. General Carlos Cavalcanti, 4748, 84030-900, Ponta*  
5 *Grossa, PR, Brazil*

6 <sup>2</sup>*CDMF-UFSCar, Universidade Federal de São Carlos, PO Box 676, 13565–905 São Carlos, SP, Brazil*

7 <sup>3</sup>*Department of Physical and Analytical Chemistry, University Jaume I (UJI), Castelló 12071, Spain*

8 *\*Corresponding author; Email address: andres@qfa.uji.es*

9

10 ***SUPPORTING INFORMATION***

11

12 **Figures**

13

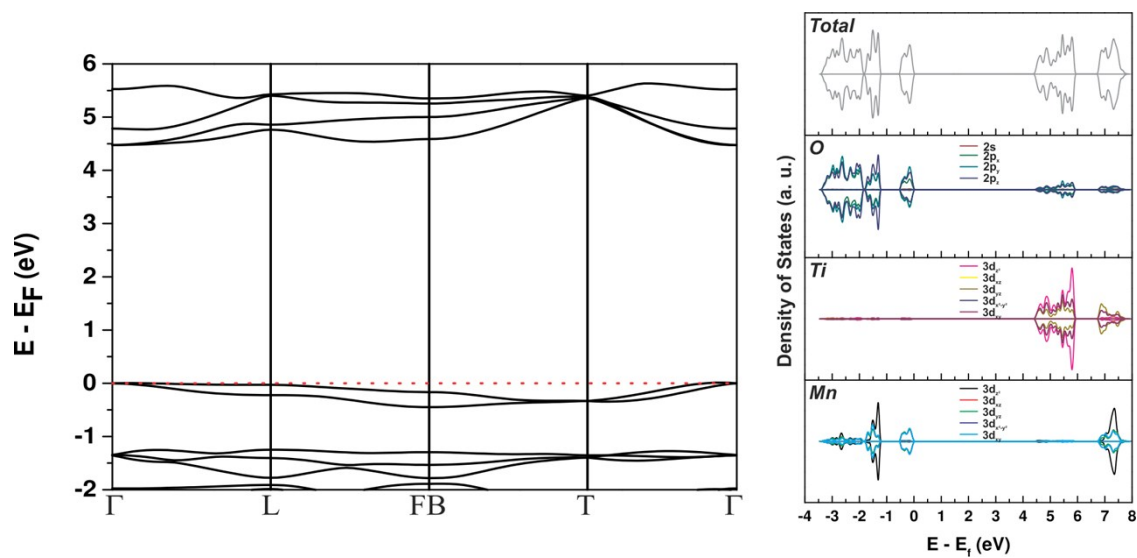

14

15 **Figure S1.** Band structure profile (left panel) and orbital resolved DOS (right panel) for pristine  $\text{MnTiO}_3$ . The

16 Fermi level was set as zero in all cases.

17

18

19

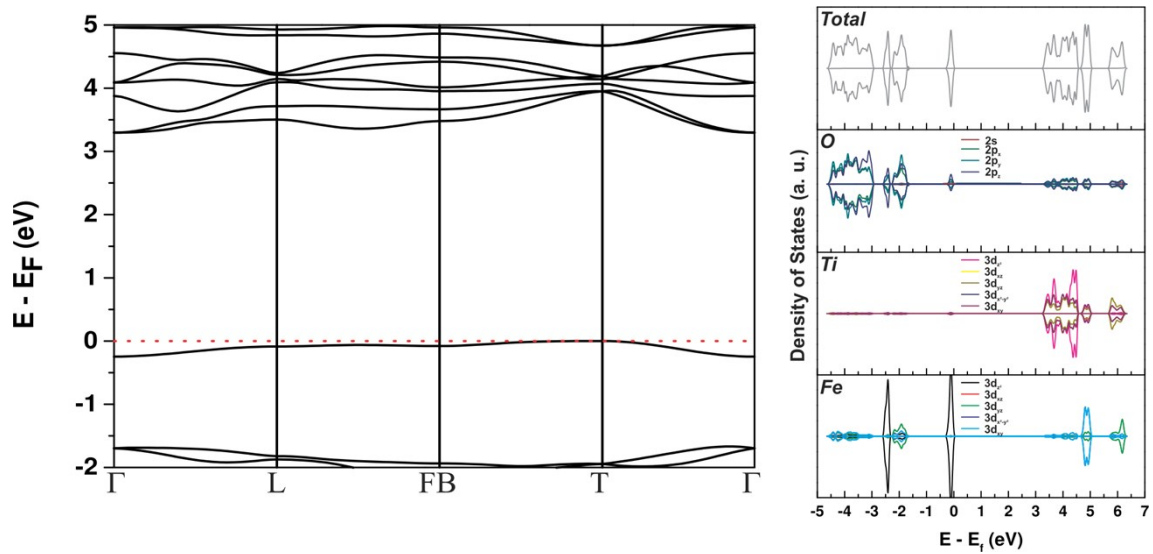

20

21 **Figure S2.** Band structure profile (left panel) and orbital resolved DOS (right panel) for pristine FeTiO<sub>3</sub>. The  
 22 Fermi level was set as zero in all cases.

23

24

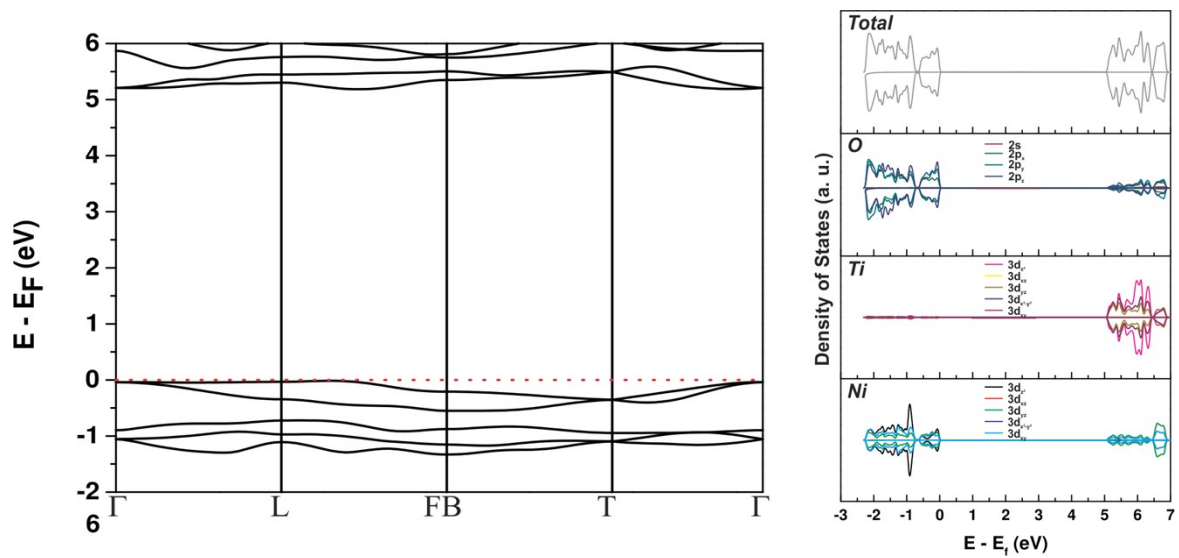

25

26 **Figure S3.** Band structure profile (left panel) and orbital resolved DOS (right panel) for pristine NiTiO<sub>3</sub>. The

27 Fermi level was set as zero in all cases.

28

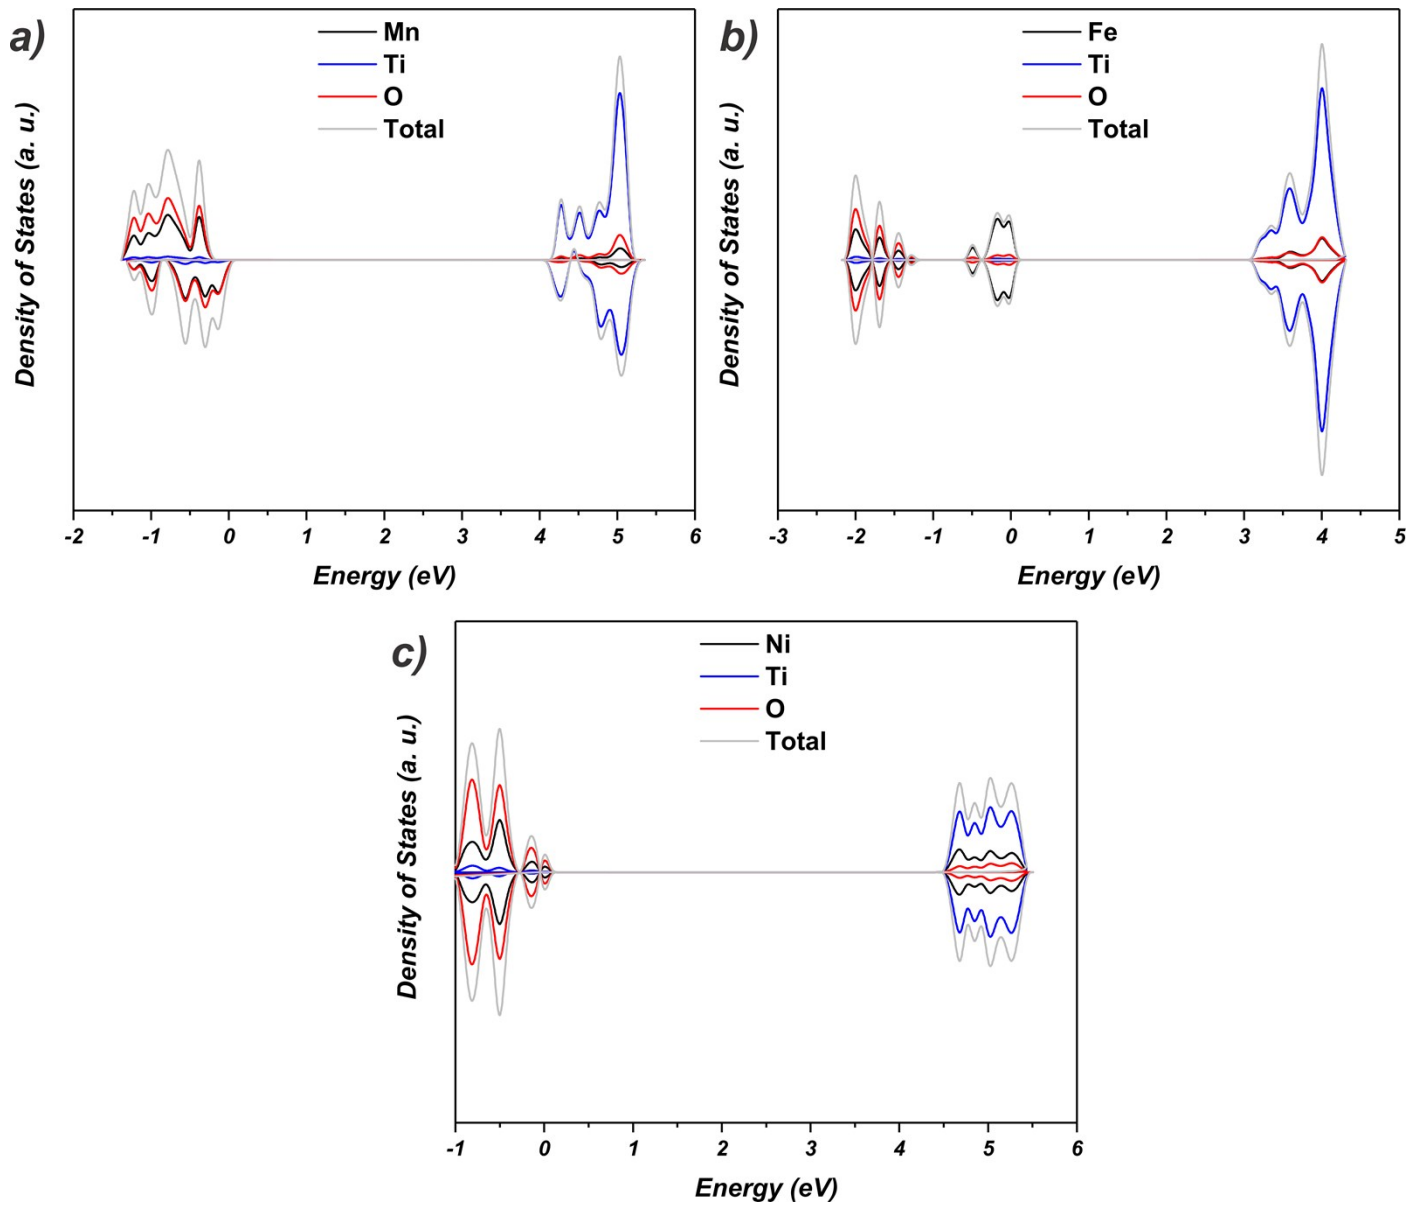

29

30 **Figure S3.** DOS profiles for pristine a) MnTiO<sub>3</sub>, b) FeTiO<sub>3</sub> and c) NiTiO<sub>3</sub>. The Fermi level was set as zero in  
 31 all cases.

32

33

34

35
